# Supplementary material for: Heterologous Expression of GbTCP4, a Class II TCP Transcription Factor, Regulates Trichome Formation and Root Hair Development in Arabidopsis
Source: MDPI journal article supplement (doi:10.3390/genes10090726), 2019-09-19
Supplement: s1 [file s1]

**Table S1.** Primer sequences used in this study.

| <b>Name</b>     | <b>Sequence</b>                                                     |
|-----------------|---------------------------------------------------------------------|
| TCP-I-F         | 5'-<br>AATTAGTCCTGGGTCCCACATGCCTGGGTCCCACATGCCTGGGTCC               |
| TCP-I-R         | CACATGCTGTTCTCGAAGCT-3'<br>5'-                                      |
| TCP-II-F        | TCGAGAACAGCATGTGGGACCCAGGCATGTGGGACCCAGGCATGT<br>GGGACCCAGGACT-3'   |
| TCP-II-R        | 5'-<br>AATTAGTCCTTGTGGGCCCCCTGCCTTGTGGGCCCCCTGCCTTGTGGG             |
| TCP-mI-F        | CCCCTGCTGTTCTCGAAGCT-3'<br>5'-                                      |
| TCP-mI-R        | TCGAGAACAGCAGGGGGCCCACAAGGCAGGGGGCCCACAAGGCAGG<br>GGCCCACAAGGACT-3' |
| TCP-mII-F       | 5'-<br>AATTAGTCCTAGATTCTAAAGGCCTAGATTCTAAAGGCCTAGATTC               |
| TCP-mII-R       | TAAAGGCTGTTCTCGAAGCT-3'<br>5'-                                      |
| CPC-PH-F        | TCGAGAACAGCCTTTAGAAATCTAGGCCTTTAGAAATCTAGGCCTTTA                    |
| CPC-PH-R        | GAATCTAGGACT-3'                                                     |
| pHIS2-F         | 5'-                                                                 |
| pHIS2-R         | AATTAGTCCTCGGGAGACTCGGCCTCGGGAGACTCGGCCTCGGGA                       |
| nGbTCP4-F       | GACTCGGCTGTTCTCGAAGCT-3'                                            |
| nGbTCP4-R       | 5'-                                                                 |
| GbTCP4-qF:5     | TCGAGAACAGCCGAGTCTCCCGAGGCCGAGTCTCCCGAGGCCGAG                       |
| GbTCP4-qR:5     | TCTCCCGAGGACT-3'                                                    |
| pGADT7-GbTCP4-F | 5'-CCGGAATTCGACCACGTGAACCCATT-3'                                    |
| pGADT7-GbTCP4-R | 5'-CGAGCTCGTCAGCATCTGTATGCCA-3'                                     |
| 3301-GbTCP4-F   | 5'-AGTCACGACGTTGTAAAACGACG-3'                                       |
| 3301-GbTCP4-R   | 5'-ATCTTTGCCTTCGTTTATCTTGCCT-3'                                     |

---

|                 |                                           |
|-----------------|-------------------------------------------|
| 1304-GbTCP4-F   | 5'-ATGGGAGATAGCCGCCACCAAGCTG-3'           |
| 1304-GbTCP4-R   | 5'-TCAATGGTGAGAATCAGATGAAGCAGAGG-3'       |
| P4-PH1-F        | 5'-AGGAGGTCACATTGTTCCGGTCA-3'             |
| P4-PH1-R        | 5'-TCGTAGCCAAGTCGGTCCTG-3'                |
| CPC-F           | 5'-CGCATATGATGGGAGATAGCCGCCACCAAGCTG -3'  |
| CPC-R           | 5'-CCCCCGGGTCAATGGTGAGAATCAGATGA-3'       |
| AtUBQ3-F        | 5'-CCCATGGGATGGGAGATAGCCGCCACCAAGCTG -3'  |
| AtUBQ3-R        | 5'-CGCACGTGCGTCAATGGTGAGAATCAGATGA-3'     |
| pGBKT7-GbTCP4-F | 5'-CCCCGGGG ATGGGAGATAGCCGCCACCAAGCTG-3'  |
| pGBKT7-GbTCP4-R | 5'-CGGGATCCCGATGGTGAGAATCAGATGA-3'        |
| GbUBQ7-F        | 5'-CCGGAATTCTTGGCAGGCTTGGTTAGG-3'         |
| GbUBQ7-R        | 5'-CGAGCTCAGCCTCTGCCATTCAATG-3'           |
| CAD5-F          | 5'-ATGTTTCGTTTCAGACAAGGC-3'               |
| CAD5-R          | 5'-TCATTTCCCTAAAAAAGTCCT-3'               |
|                 | 5'-CGGAAAGACCATTACTCTGGA-3'               |
|                 | 5'-CAAGTGTGCGACCATCCTCAA-3'               |
|                 | 5'-CCCATGGG ATGGGAGATAGCCGCCACCAAGCTG -3' |
|                 | 5'-CGCACGTGCGCAATGGTGAGAATCAGATGA-3'      |
|                 | 5'-GACCTACACCAAGCCCAAGAAG-3'              |
|                 | 5'-TGAGCCCACACTTACCACAATAGT-3'            |
|                 | 5'-TTGGCTGATTCGTTGGATTA-3'                |
|                 | 5'-ATCACTTTCCTCCCAAGCAT-3'                |

---

AAATAAAGCATAAAATAAATATTTTTTAAAAAAGCTGTGAA**TTGGGGTC**ACTGTCAAAAGTTGTGATGGT  
 GGCATATAAGAAAGGATCTATTCATTCATCTGATCTAATCAAAACAAAGCATCCAGACAAATCCCTTCAACTA  
 TAACCAACACTTCTTAACCTCTAGCTATGGAACTAAGTTAAAAAAGAAAAAGACTGAAAAGGTTGTTA  
 CTTTCTTACCACTTACTAGGTTATCAATTTTTAAGACAGGTTGAAAATTTAAAGTCATGTAAATCAAATCTATCT  
 ATACCTTAGTAAAAAATAAGAAAAAGGGTTATATAATTTATACTGGAAATGAGAAAAAGTTGAAAAAAGAG  
 GGTGGATTTAGGTTGGTTGAAATGGGGAGAGAGGTGGGAAAAATGGTGTTTTAGATTGTGTAGTTTTA  
 GGGTAAAAGTACAGAATAAAACAGCAGCAAATGCAGTGATGAGATGAACAGAGATCTTAATCTTTGTCT**G**  
**ACCCCA**AAAAACTGCCACCTTAGCAGTGGCATCATCATCAACATCAAGGGTGTCTATAGGCCAAAGTA  
 AAGTGTGTTTACTCTTCCCTATACTATAGCTATTAAGCTATAAGCCCATATATATTTTGCTCTTCTAAACAAACC  
 AAGTTTTTTTTCTCTCTTTTCGTTTAGTTGTAGCTTGTCTGAAAGAGTTTCTAGTTAGTATAGTTTCCAAGA  
 AAATCCTTGTTGAGAAGAGAACATTTTGTGTTTGTGTTGTTGGTGGTGGTGGCTAAGTGTGAAAACCC  
 GTTCGTTGCTGAATAGATAGTACATAAATAACAGAGAGCTCCTATATTGCCAAAAGCTGAGTTTTTTAGAG  
 AGAAAATAGAAAGAGAAACAAGGAGAAAAAACGATGGGTTAGGCTGGGGGAATAATAGGGGCTGGGGT  
 TTTTTGTTTTTTTGTGTTAGTTGGCAGGCTTGGTTAGGGAAGAGTGGTGGTGGTGGTGGT**GGGGGGGC**  
**CGGCC**TTTGGTGTGTGTGGTATGATGGAATTAGAATCATTGAATGGCAGAGGCTTTGAGAGAGGTCACA  
 GTATCAGGTTTCAGT**GTGGTGGCAG**TAGCTCATACAGGTAGAGGATATTAGCAAGCAAAGAACAACAACACTAC  
 AACCCAGTAACATAAAAAAGGTATCCTCCATTAAGCTGGAACAGCAAAAGCACCAGGGCCTGACTCTGG  
 ATCCTCAAAGGCATCATCATCAGCAGCAGCAGCAGCAGCAGCAGCAACAGCAACATCAGAATCCATCTC  
 ATATAGGAGGAGGAGGAGAAGAAGAAGAAATTGCGAGGAACCAACAGCAAATCTGTTTCTCCATCATCAA  
 CAACAGCAAGGGCAACAGTTGTATGCAAGCCTGGAACTCAAGTACTACGAGAGCAGCAAGGGCAACAAC  
 AACAGCAAGAGTACCCACAACCAAGAAACGCTCTTATCTGCCGTCGGCTTCTACTTCAACT**TTGGTT**  
**CCAA**ATCAACCCAACATGCAAGAAAA

**Figure S1.** The promoter sequences of *GbTCP4*. The predicted TCP-binding site is represented by yellow.
